# Supplementary material
Source: publisher figshare collection journal article supplement (https://acs.figshare.com/ndownloader/files/14109803)
Supplement: Supplementary file 1 [file 14109803]

# Dual Tuning of Ultra-thin $\alpha$ -Co(OH)<sub>2</sub> Nanosheets by Solvent Engineering and Coordination Competition for Efficient Oxygen Evolution

*Zuozhong Liang,<sup>[a]</sup> Chaochao Zhang,<sup>[a]</sup> Yang Xu,<sup>[a]</sup> Wei Zhang,<sup>[a]</sup> Haoquan Zheng,<sup>\*[a]</sup> and Rui Cao<sup>\*[a, b]</sup>*

[a] Key Laboratory of Applied Surface and Colloid Chemistry, Ministry of Education, School of Chemistry and Chemical Engineering, Shaanxi Normal University, Xi'an, 710119, China

[b] Department of Chemistry, Renmin University of China, Beijing, 100872, China.

## **Corresponding Author**

E-mail: zhenghaoquan@snnu.edu.cn; ruicao@ruc.edu.cn.

Number of pages: 31

Number of figures: 30

Number of tables: 0

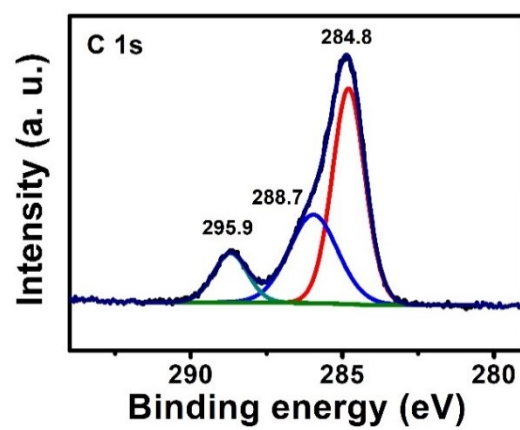

**Figure S1.** The high-resolution C 1s XPS spectrum

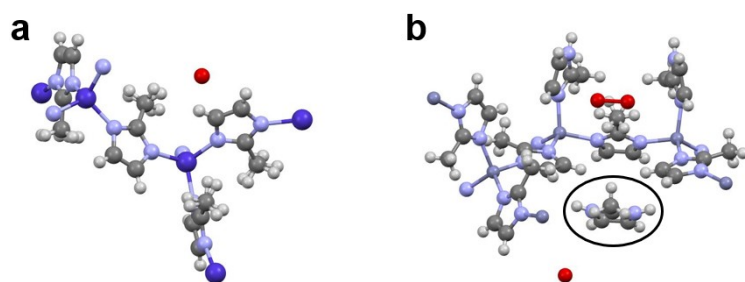

**Figure S2.** Crystal structures of ZIF-67 (a) and ZIF-L (b).

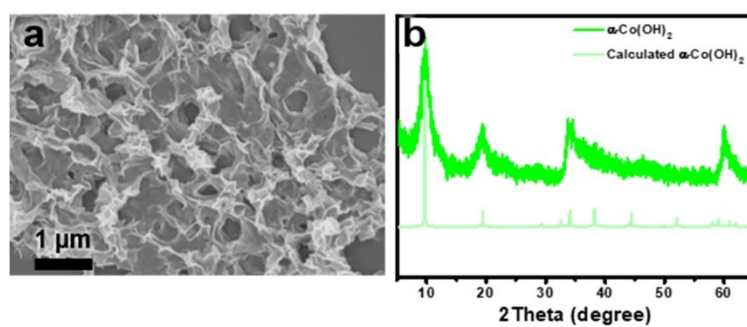

**Figure S3.** SEM image (a) and the corresponding XRD pattern (b) of the  $\alpha\text{-Co(OH)}_2$  obtained by dissolving  $\text{Co(NO}_3)_2$  and 2-MI in methanol and water, respectively. The calculated XRD pattern of  $\alpha\text{-Co(OH)}_2$  is shown in Figure S3a<sub>1</sub>.

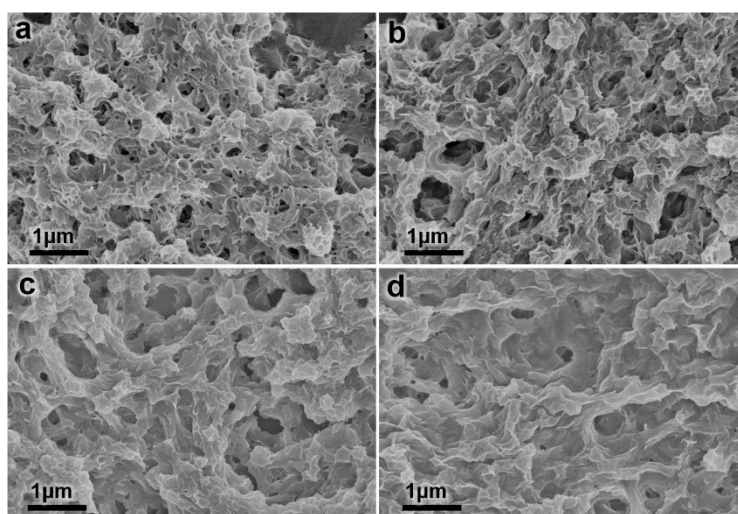

**Figure S4.** SEM images of the as-prepared products without aging (a) and with different aging time (b: 1h; c: 3h; d: 9h)

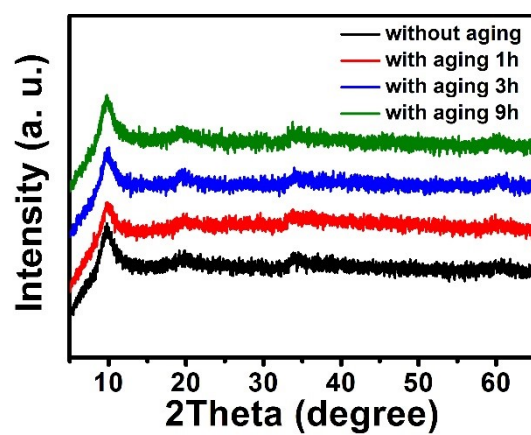

**Figure S5.** XRD patterns of the as-prepared products without aging and with different aging time

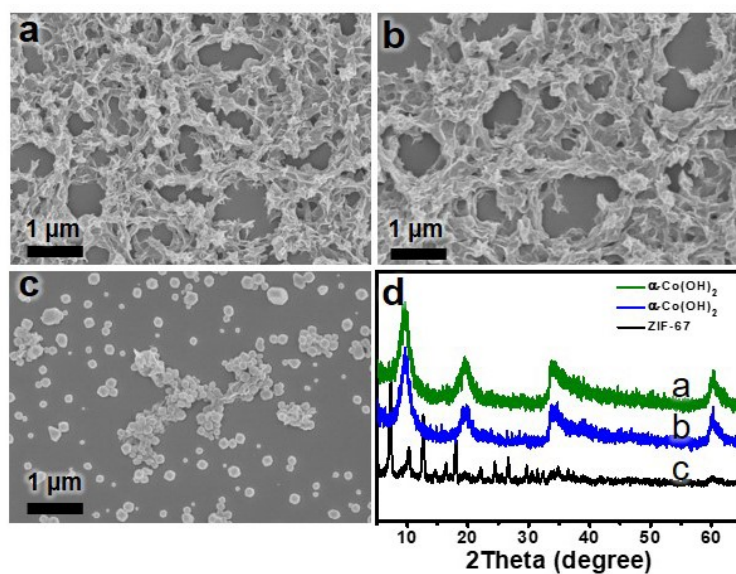

**Figure S6.** SEM images (a-c) and experimental XRD patterns (d) of as-prepared products with different molar ratio of Co/2-MI (a-1:1, b-1:3, and c-1:4).

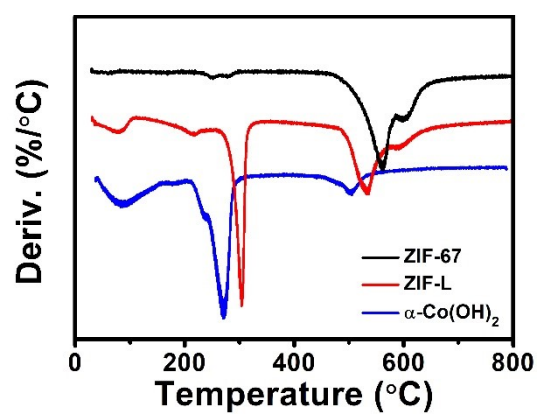

**Figure S7.** The differential thermal gravity (DTG) curves of the as-prepared ZIF-67, ZIF-L, and  $\alpha$ -Co(OH)<sub>2</sub>.



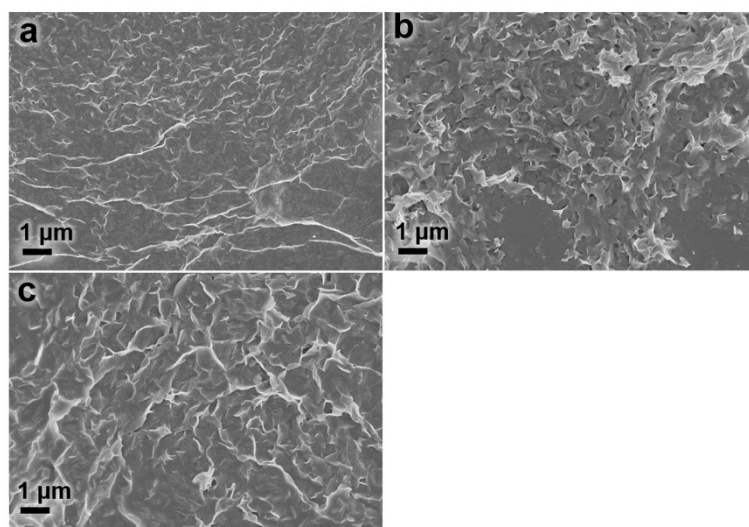

**Figure S8.** SEM images of the as-prepared products with different imidazole (a: 2-ethylimidazole; b: 2-propylimidazole; c: 2-buthylimidazole)

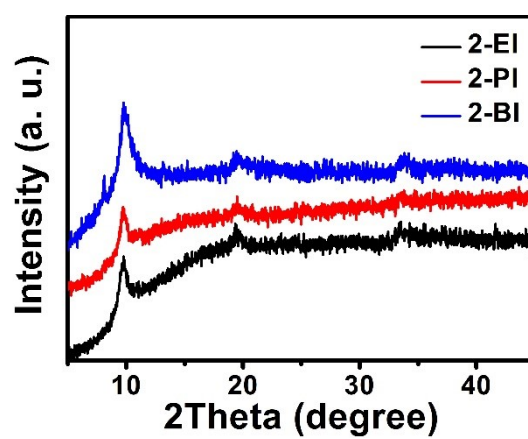

**Figure S9.** XRD patterns of the as-prepared products with different imidazole (2-ethylimidazole (2-EI); 2-propylimidazole (2-PI); 2-buthylimidazole (2-BI))

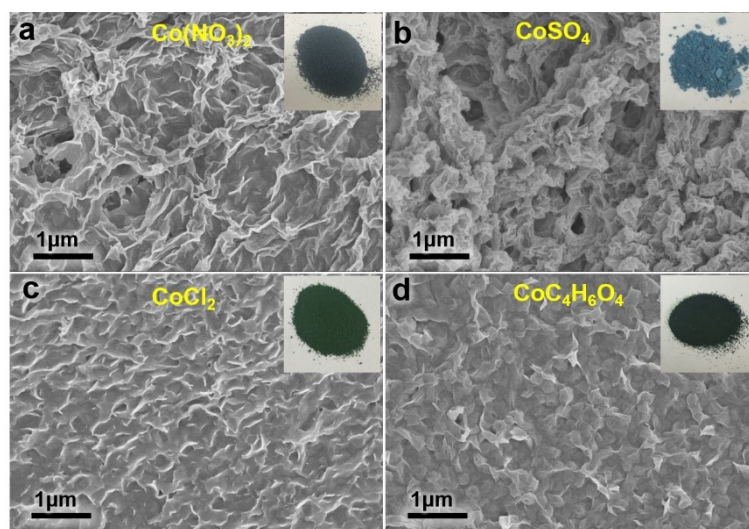

**Figure S10.** SEM images of the as-prepared products with different Co salts (a:  $\text{Co(NO}_3)_2$ ; b:  $\text{CoSO}_4$ ; c:  $\text{CoCl}_2$ ; d:  $\text{CoC}_4\text{H}_6\text{O}_4$ )

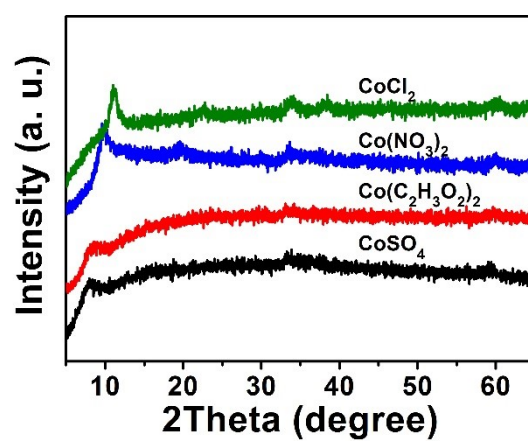

**Figure S11.** XRD patterns of the as-prepared products with different Co salts

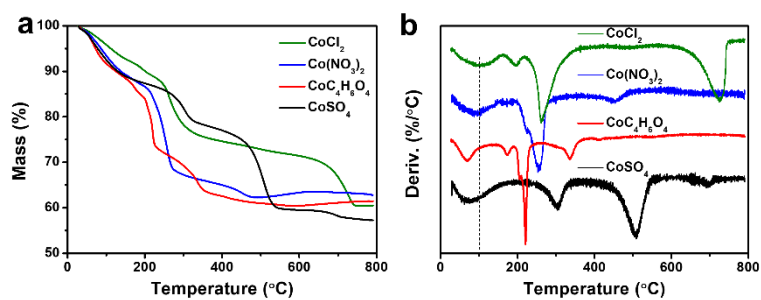

**Figure S12.** TGA curves (a) and corresponding DTG curves (b) of Co(OH)<sub>2</sub> nanosheets prepared with different salts

The decreased temperature of the water removal from CoCl<sub>2</sub> to Co(NO<sub>3</sub>)<sub>2</sub> to CoC<sub>4</sub>H<sub>6</sub>O<sub>4</sub> to CoSO<sub>4</sub> confirms the increased distance between layers. This is because the water molecules evaporate quickly when located in nanosheets with larger layer distance. The different decomposition temperature for the as-prepared Co(OH)<sub>2</sub> nanosheets further confirms the existence of counterbalance anions between layers.

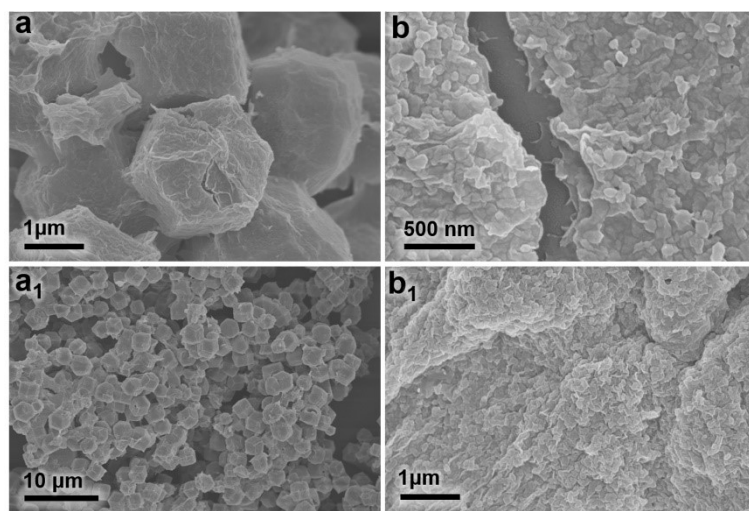

**Figure S13.** SEM images of the as-prepared materials dispersing the ZIF-67 (a, a<sub>1</sub>) and ZIF-L (b, b<sub>1</sub>) in water/methanol mixed solvent.

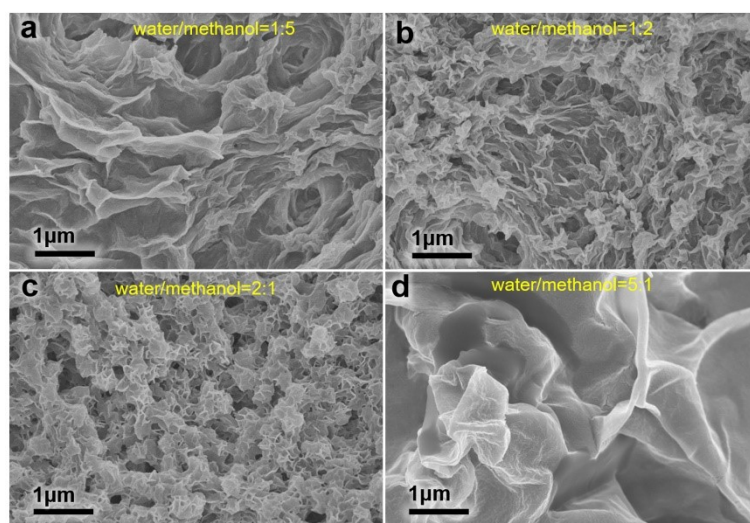

**Figure S14.** SEM images of the as-prepared products with different amount of solvents

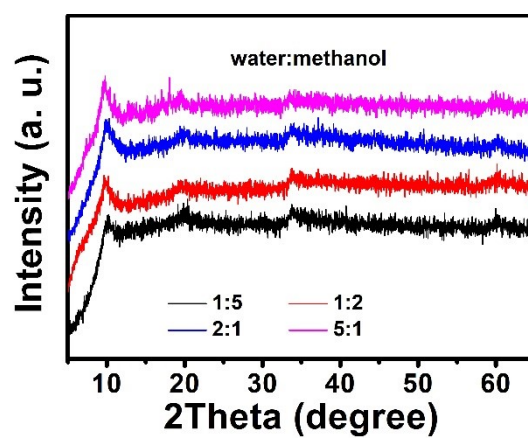

**Figure S15.** XRD patterns of the as-prepared products with different amount of solvents



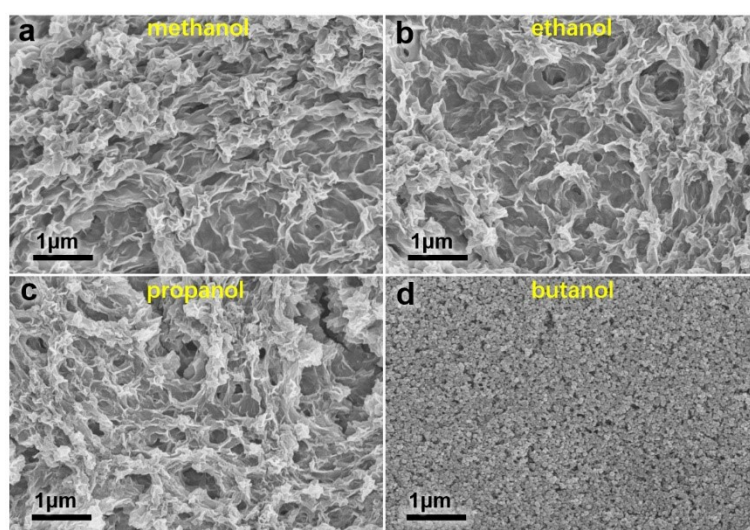

**Figure S16.** SEM images of the as-prepared products with different solvents (a: methanol; b: ethanol; c: propanol; d: butanol)

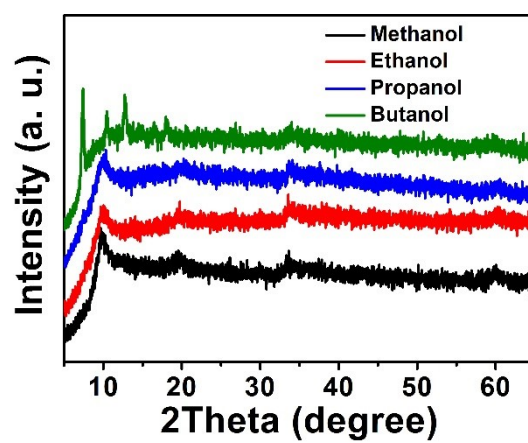

**Figure S17.** XRD patterns of the as-prepared products with different solvents (methanol, ethanol, propanol, and butanol)

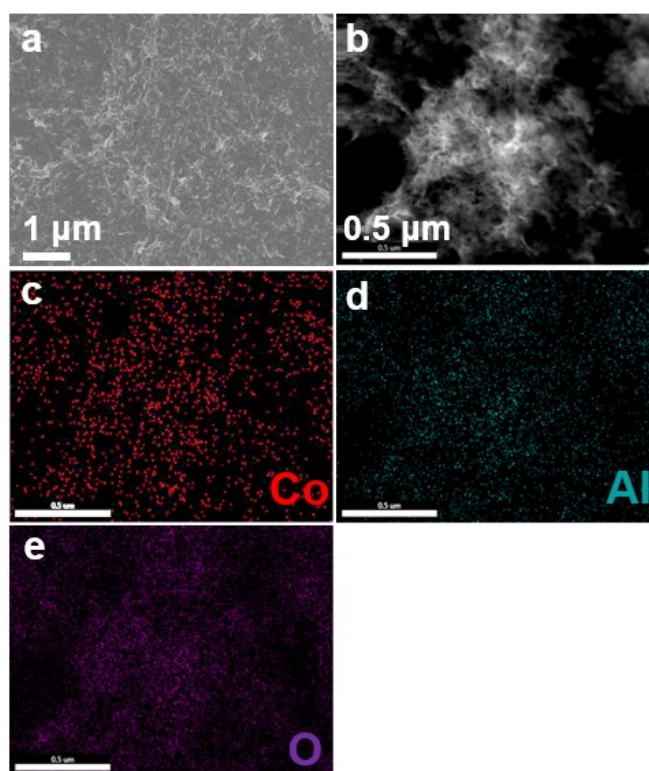

**Figure S18.** The SEM image (a), HAADF-STEM image (b) and the elemental mapping images (c-e) of the as-prepared Al-Co nanosheets.

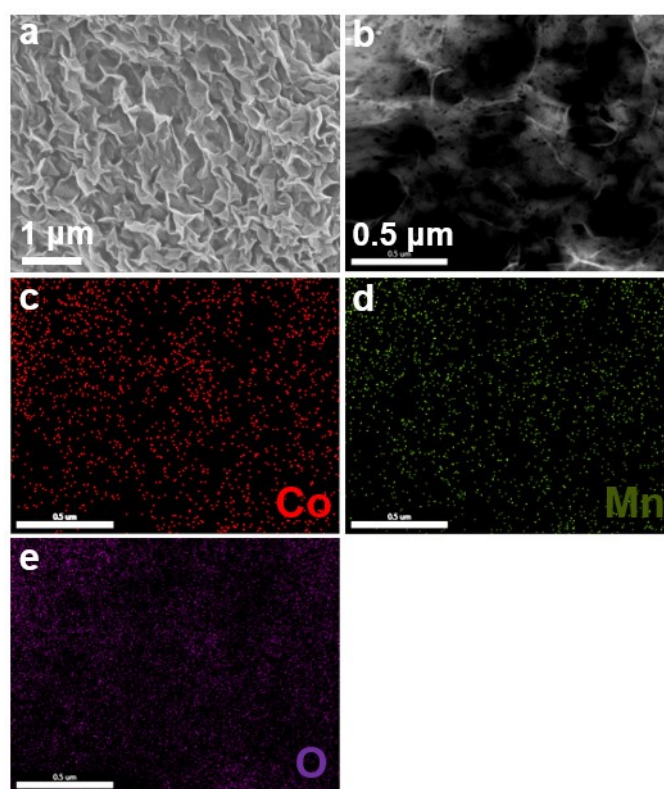

**Figure S19.** The SEM image (a), HAADF-STEM image (b) and the elemental mapping images (c-e) of the as-prepared Mn-Co nanosheets.

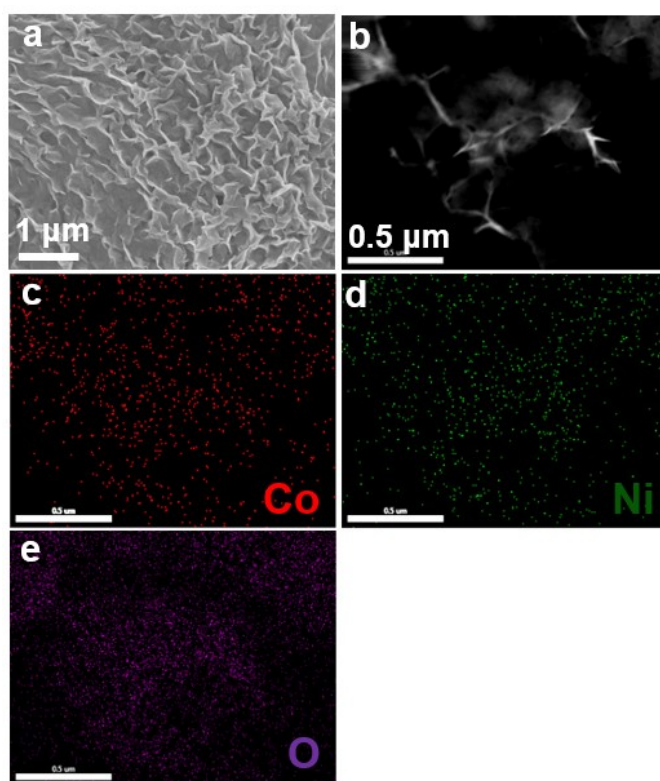

**Figure S20.** The SEM image (a), HAADF-STEM image (b) and the elemental mapping images (c-e) of the as-prepared Ni-Co nanosheets.

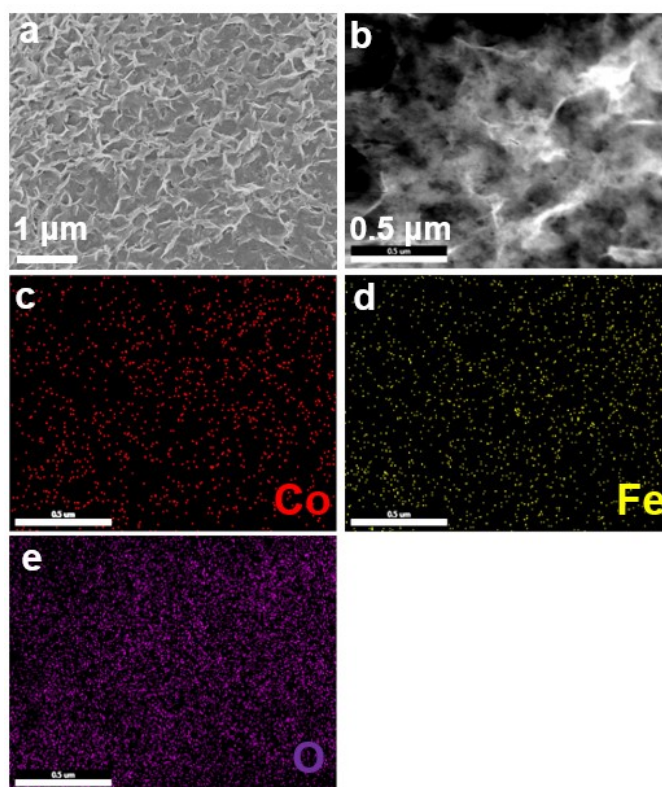

**Figure S21.** The SEM image (a), HAADF-STEM image (b) and the elemental mapping images (c-e) of the as-prepared Fe-Co nanosheets.

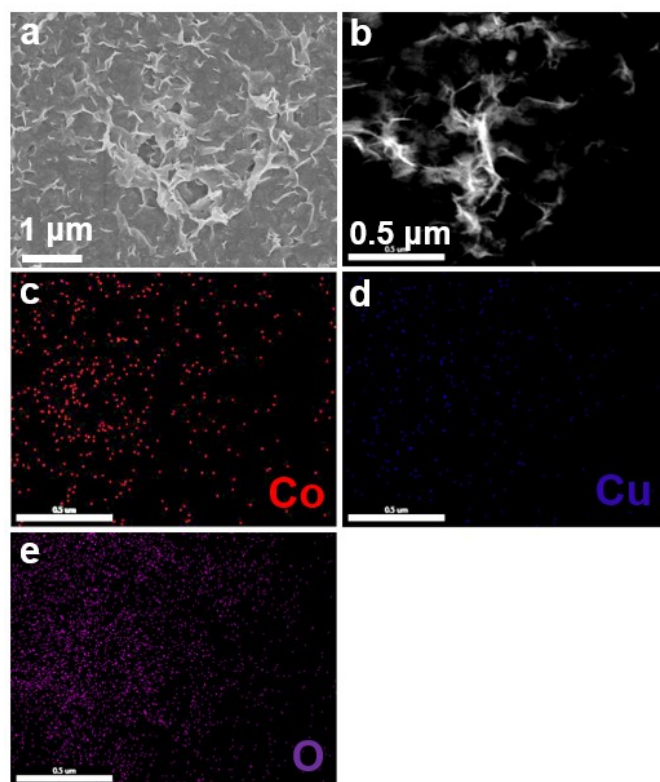

**Figure S22.** The SEM image (a), HAADF-STEM image (b) and the elemental mapping images (c-e) of the as-prepared Cu-Co nanosheets.



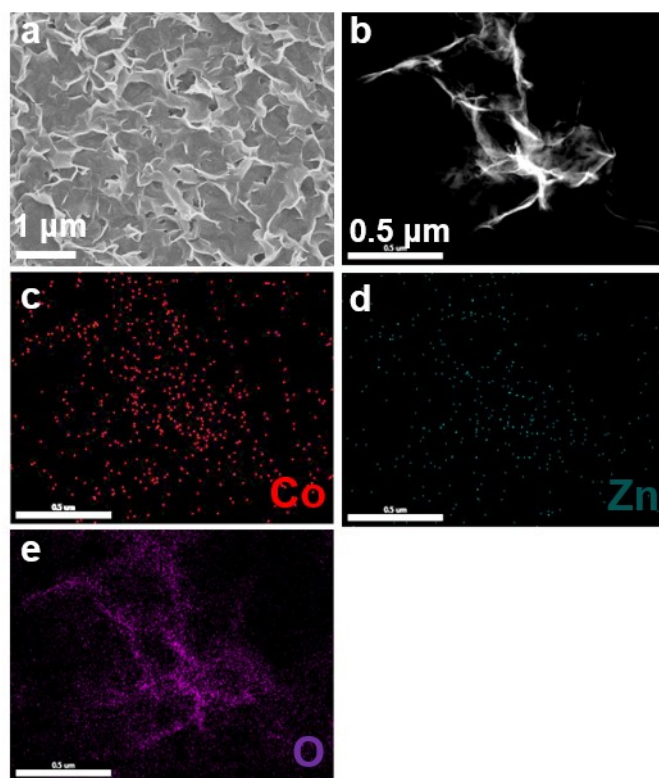

**Figure S23.** The SEM image (a), HAADF-STEM image (b) and the elemental mapping images (c-e) of the as-prepared Zn-Co nanosheets.



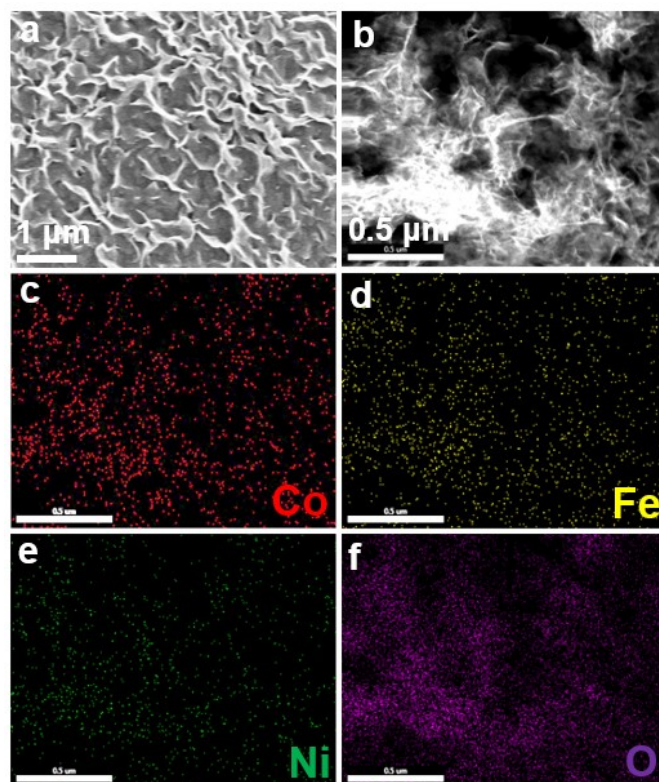

**Figure S24.** The SEM image (a), HAADF-STEM image (b) and the elemental mapping images (c-f) of the as-prepared Ni-Fe-Co nanosheets.

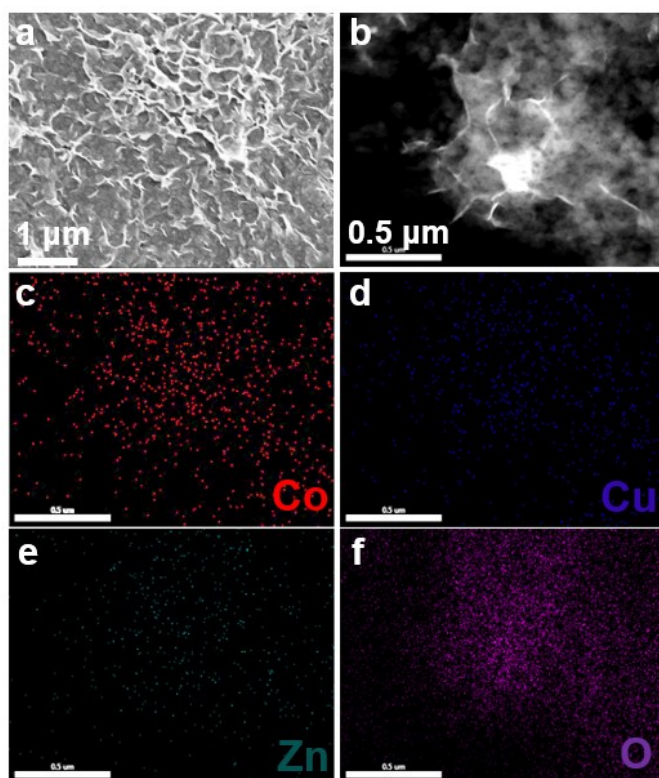

**Figure S25.** The SEM image (a), HAADF-STEM image (b) and the elemental mapping images (c-f) of the as-prepared Cu-Zn-Co nanosheets.

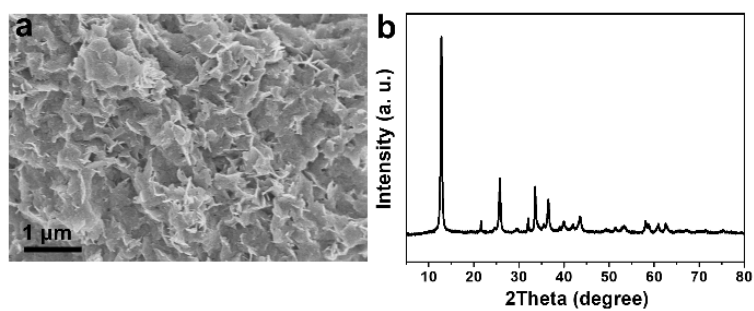

**Figure S26.** The SEM image and XRD pattern of as-prepared Cu hydroxide nanosheets.

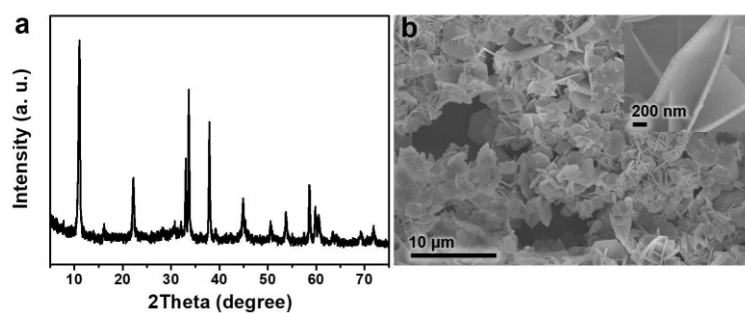

**Figure S27.** XRD pattern (a) and SEM image (b) of hexagonal  $\alpha$ -Co(OH)<sub>2</sub> plates

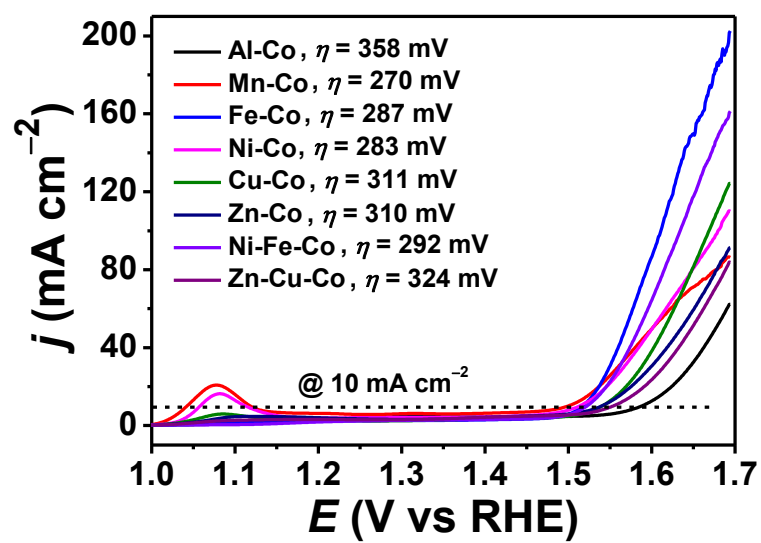

**Figure S28.** LSV curves of Co-based layered double and triple hydroxides

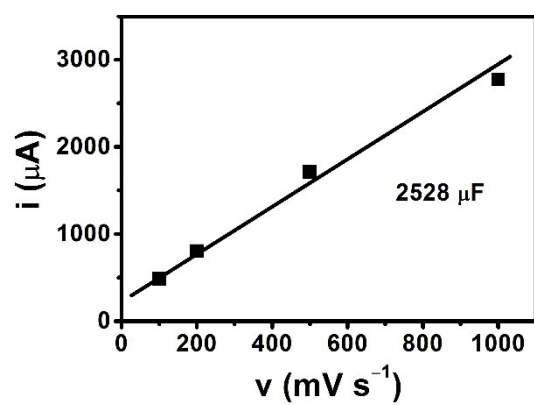

**Figure S29.** Capacitance currents dependence of scan rates for the  $\alpha\text{-Co(OH)}_2$  nanosheets.

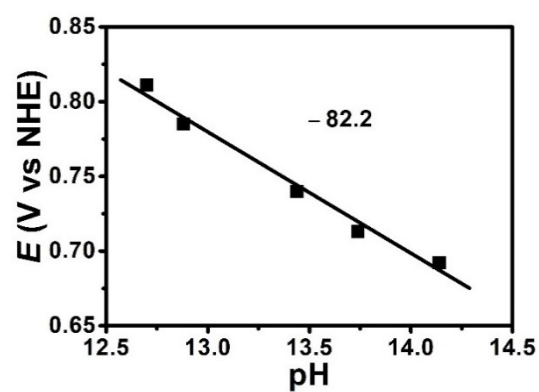

**Figure S30.** The pH dependence of the potential  $E$  at a specific current density ( $10 \text{ mA cm}^{-2}$ ) for the  $\alpha\text{-Co(OH)}_2$  nanosheets
